# Supplementary material for: Highly efficient NIR–NIR upconversion in potassium substituted CaMoO4:Tm3+, Yb3+ phosphor for potential biomedical applications
Source: Royal Society of Chemistry journal article supplement (doi:10.1039/c4ra12436g), 2015-01-01
Supplement: c4ra12436g1.pdf [file c4ra12436g1.pdf]

## Highly Efficient NIR-NIR Upconversion in Potassium Substituted $\text{CaMoO}_4:\text{Er}^{3+},\text{Yb}^{3+}$ Phosphor for Potential Biomedical Applications

Hom Nath Luitel<sup>1,2\*</sup>, Rumi Chand<sup>1</sup>, Toshio Torikai<sup>1</sup>, Mitsunori Yada<sup>1</sup>, Takanori Watari<sup>1#</sup>

### Electronic Supplementary Information (ESI):

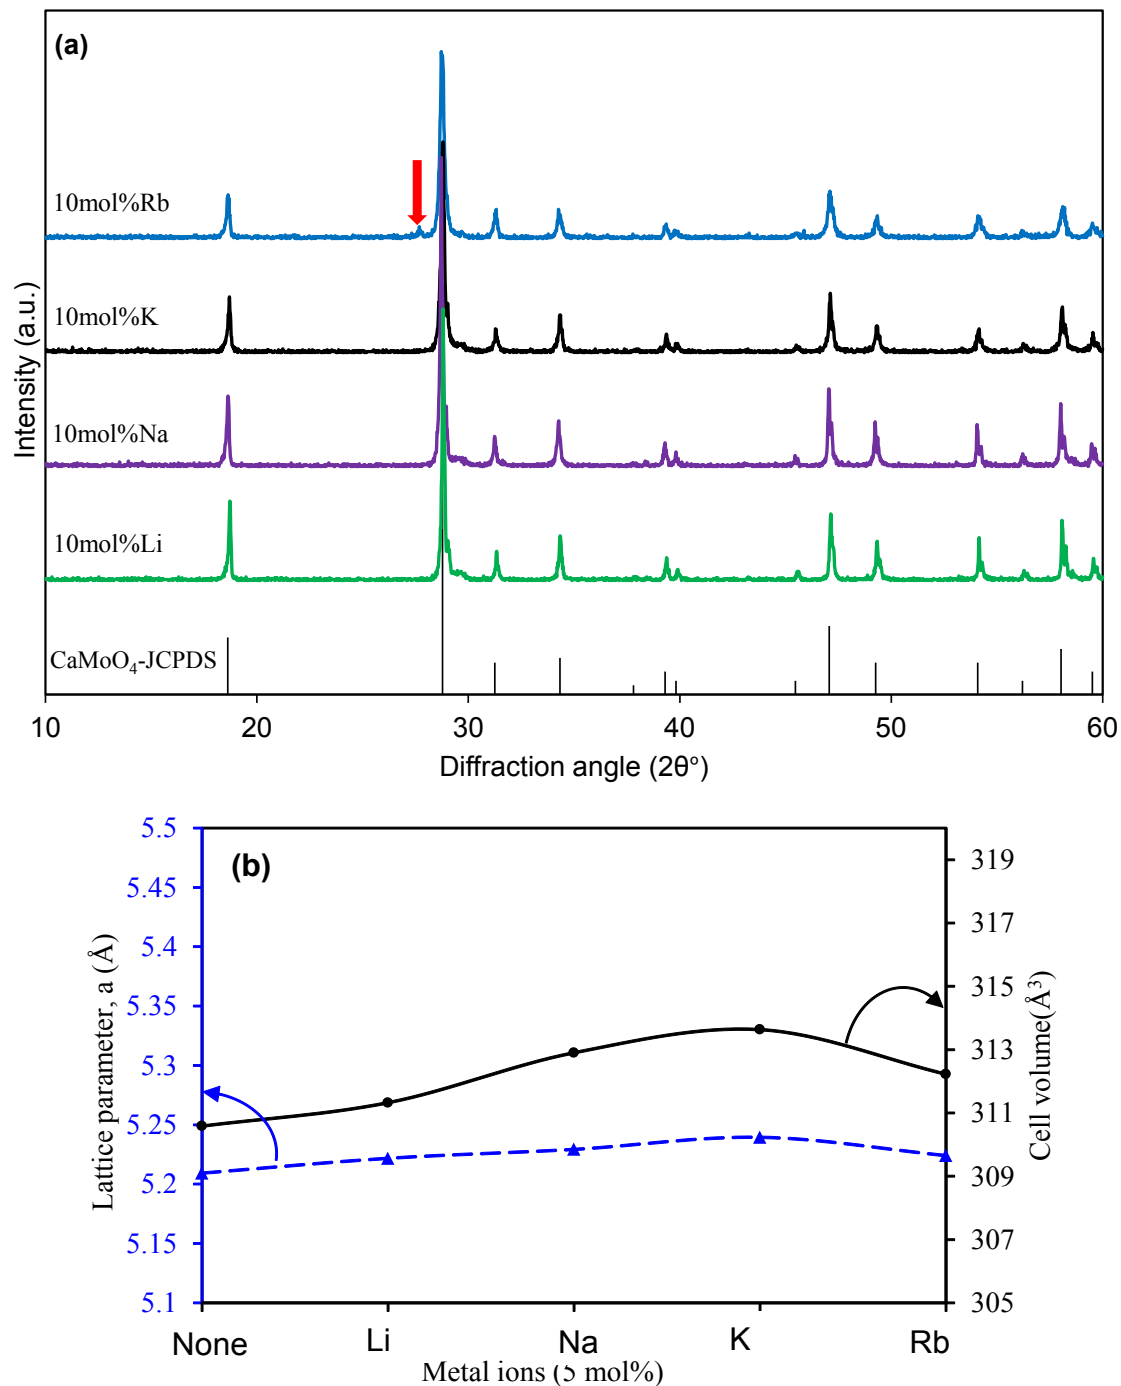

Fig. S1 XRD patterns of 10 mol%  $\text{M}^+$  ( $\text{M} = \text{Li}, \text{Na}, \text{K}, \text{Rb}$ ) substituted  $\text{CaMoO}_4:0.001\text{Tm}^{3+}, 0.1\text{Yb}^{3+}$  phosphors (a) and variation of lattice parameters with alkali metal ions substitution (b).

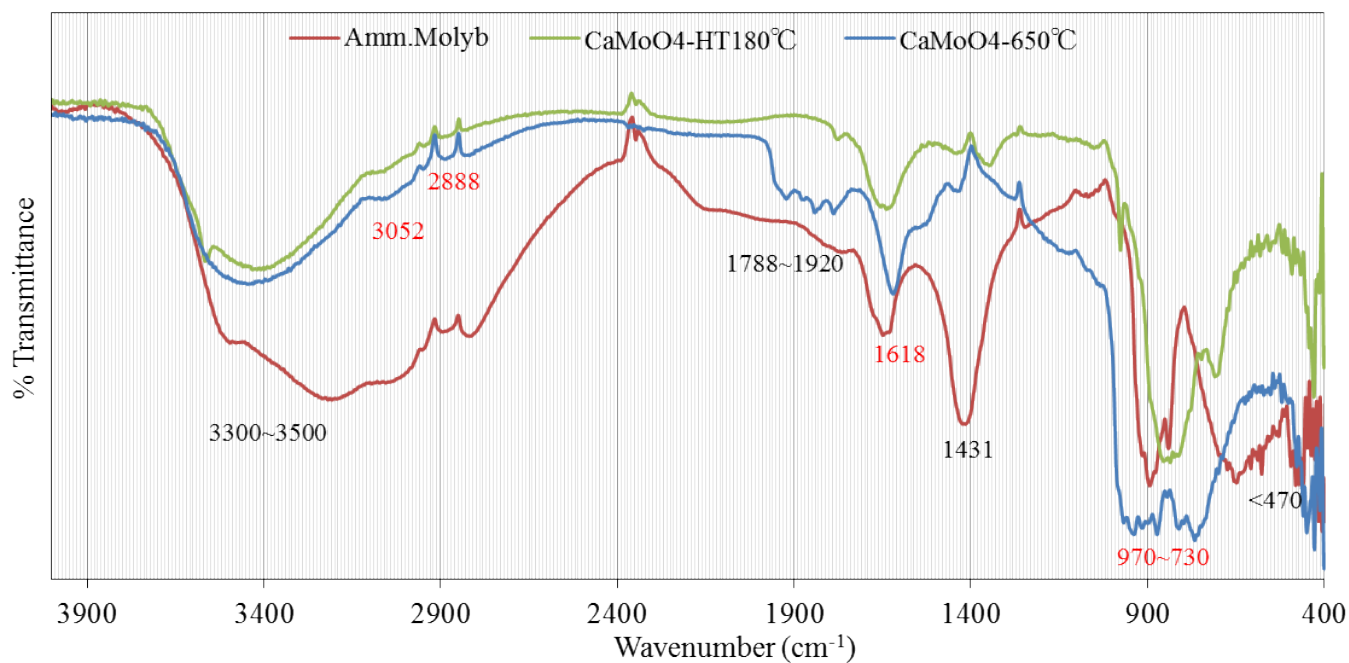

Fig. S2 FT-IR spectra of Ammonium molybdate tetrahydrate (precursor used during HT process), CaMoO<sub>4</sub> phosphor prepared by HT at 180 °C and CaMoO<sub>4</sub> phosphor post annealed at 650°C for 1hour.

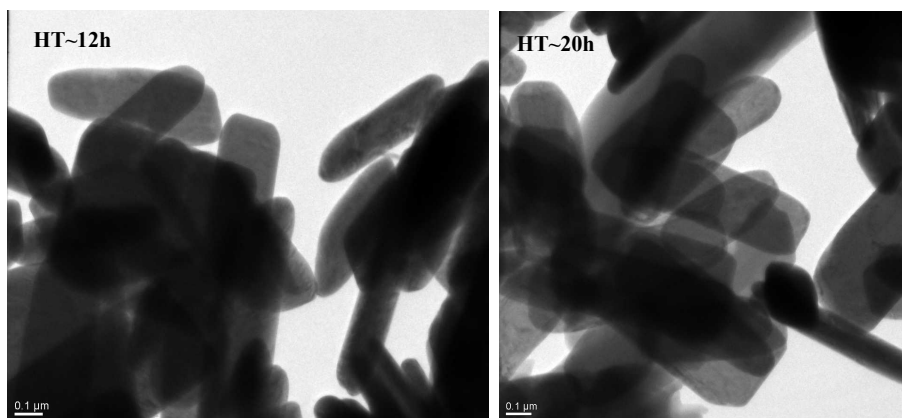

Fig. S3 TEM images of rice grains CaMoO<sub>4</sub>:Tm<sup>3+</sup>, Yb<sup>3+</sup> size changed with hydrothermal treatment time.

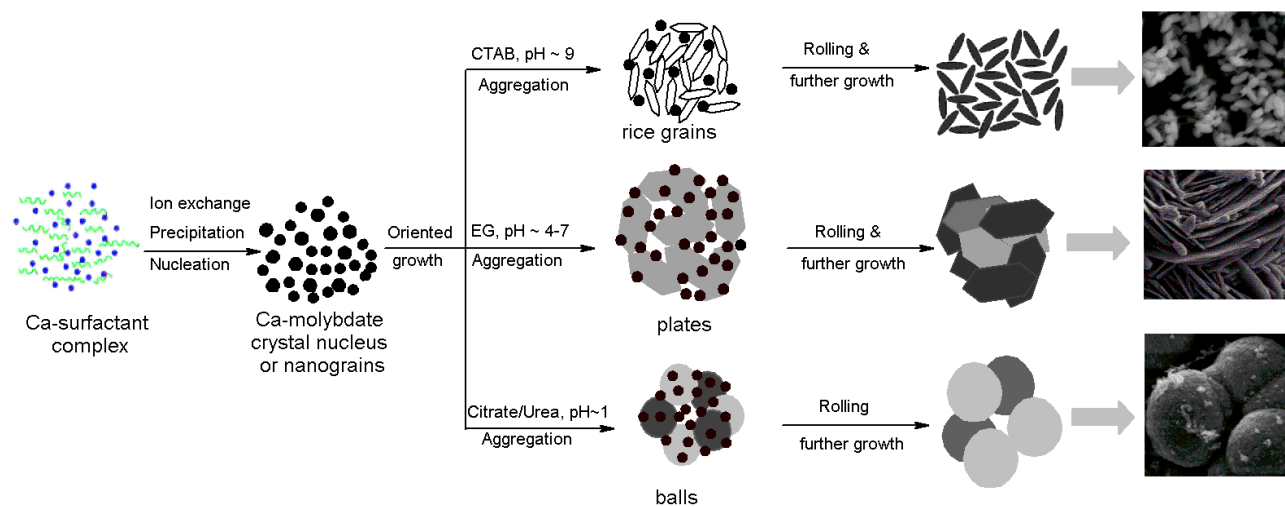

Fig. S4 Formation mechanism of different shaped  $\text{CaMoO}_4:\text{Tm}^{3+}, \text{Yb}^{3+}$  phosphors according to the reaction conditions.

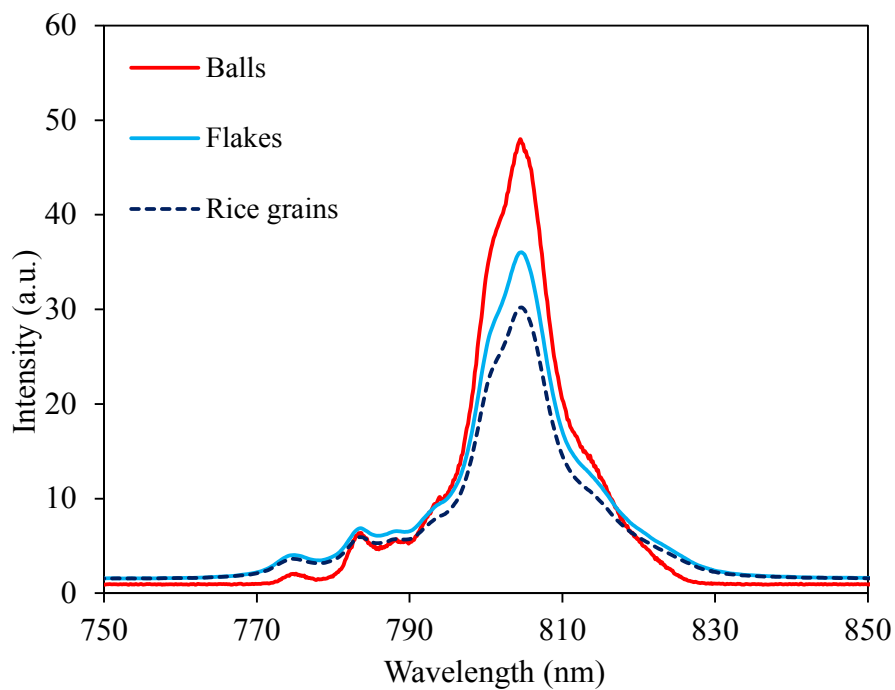

Fig. S5 Variation of UC emission intensity of  $\text{CaMoO}_4:\text{Tm}^{3+}, \text{Yb}^{3+}, \text{K}^+$  phosphors according to the particles shape.

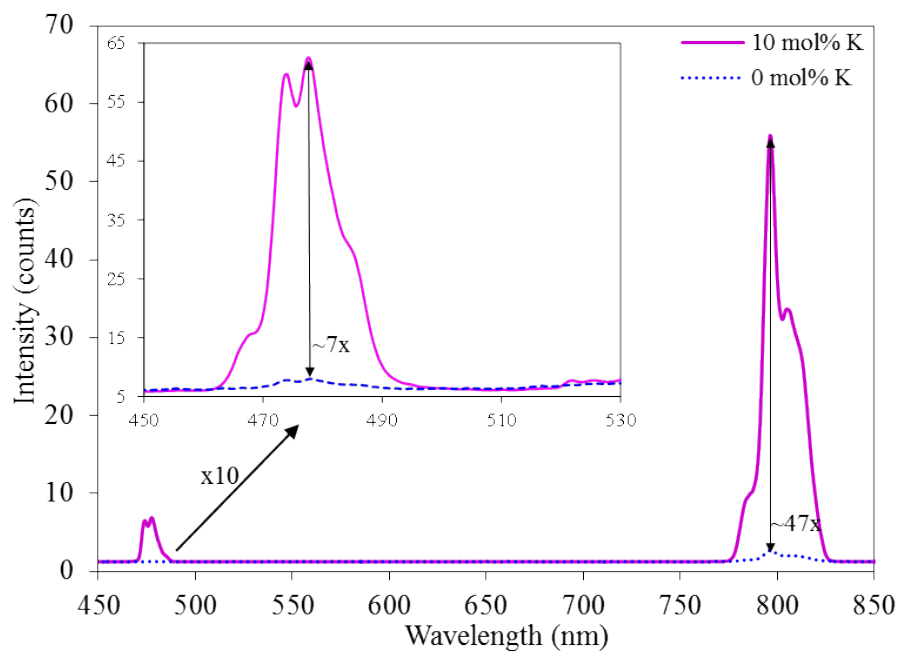

Fig. S6 UC emission (477nm Vs 797nm) intensification of  $\text{CaMoO}_4:\text{TM}^{3+}, \text{Yb}^{3+}$  phosphors by  $\text{K}^+$  substitution.
